# Supplementary material
Source: publisher figshare collection journal article supplement (https://tandf.figshare.com/ndownloader/files/14886764)

## Supplemental Data

**Figure 1.** ICC staining of A431 tumor cells treated with only secondary FITC-conjugated #ab6717 (Abcam, Cambridge, UK) anti-rabbit antibodies (negative control).

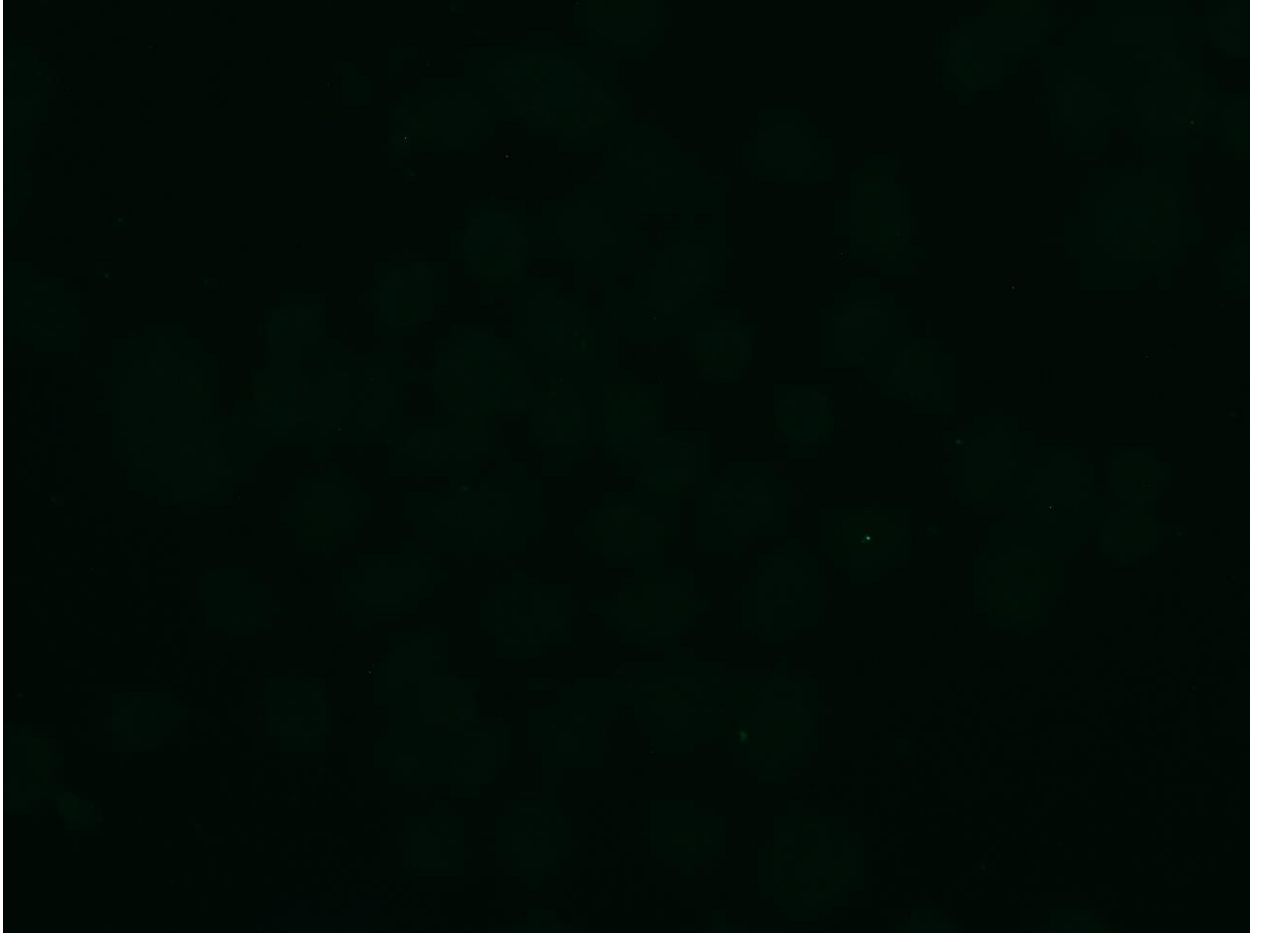

**Figure 2.** ICC staining of PHF normal cells treated with only secondary FITC-conjugated #ab6717 (Abcam, Cambridge, UK) anti-rabbit antibodies (negative control).

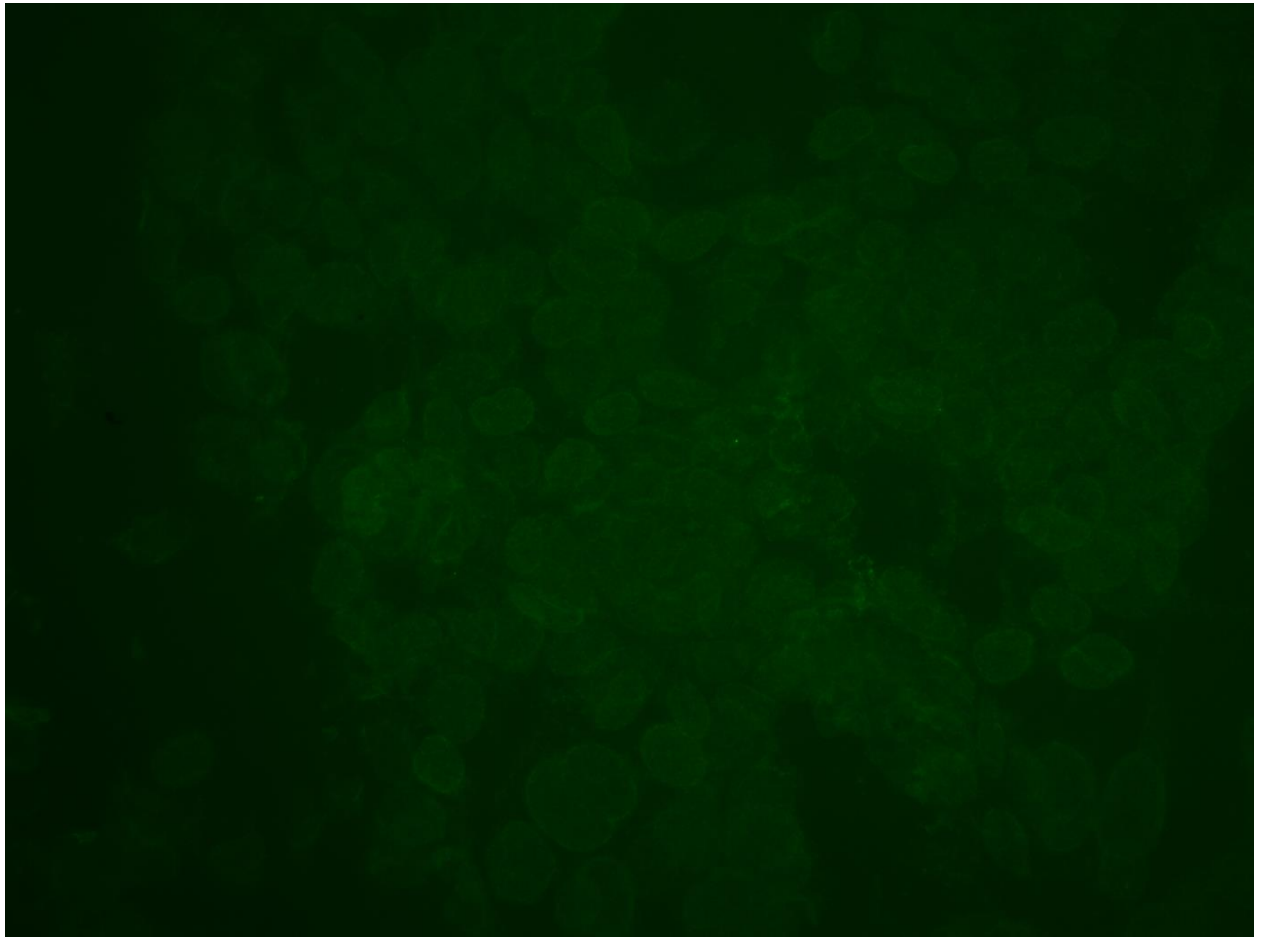

**Figure 3.** ICC staining of A431 tumor cells treated with 0.05% PBST prior to fixation. Staining with only secondary FITC-conjugated #ab6717 (Abcam, Cambridge, UK) anti-rabbit antibodies (negative control).

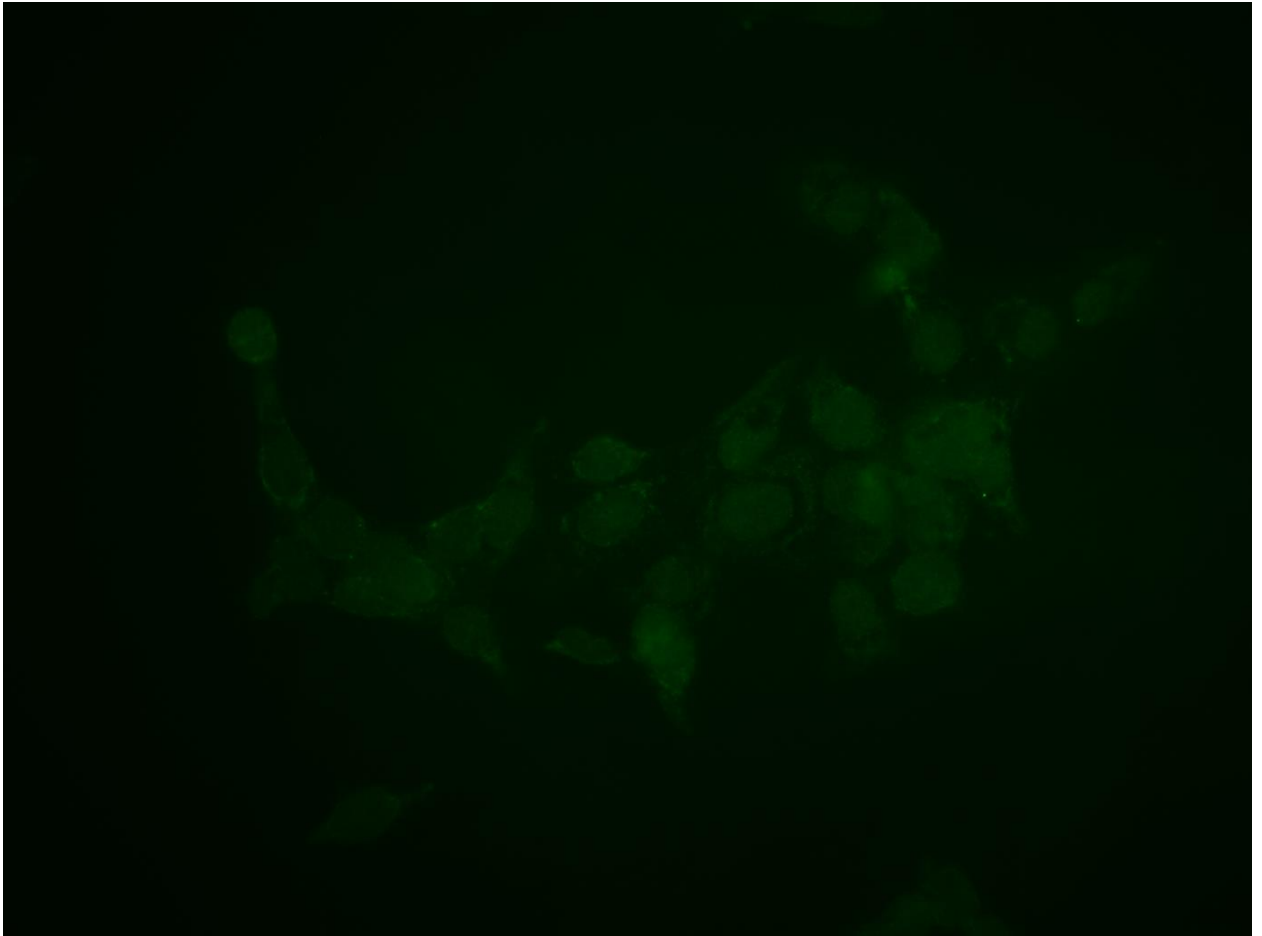

**Figure 4.** ICC staining of PHF normal cells treated with 0.05% PBST prior to fixation. Staining with only secondary FITC-conjugated #ab6717 (Abcam, Cambridge, UK) anti-rabbit antibodies (negative control).

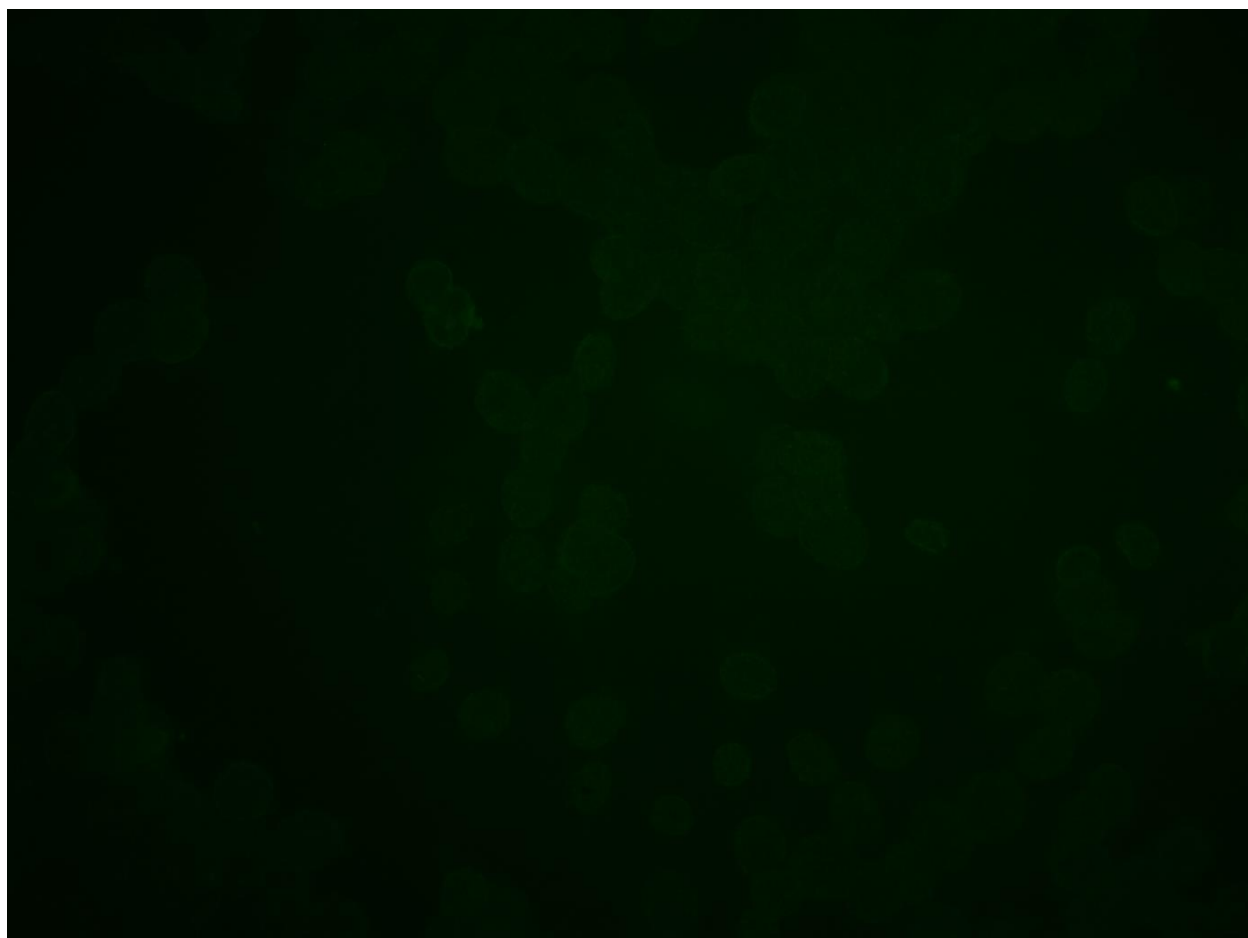

**Figure 5.** ICC staining of BRO tumor cells treated with only secondary FITC-conjugated #ab6717 (Abcam, Cambridge, UK) anti-rabbit antibodies (negative control).

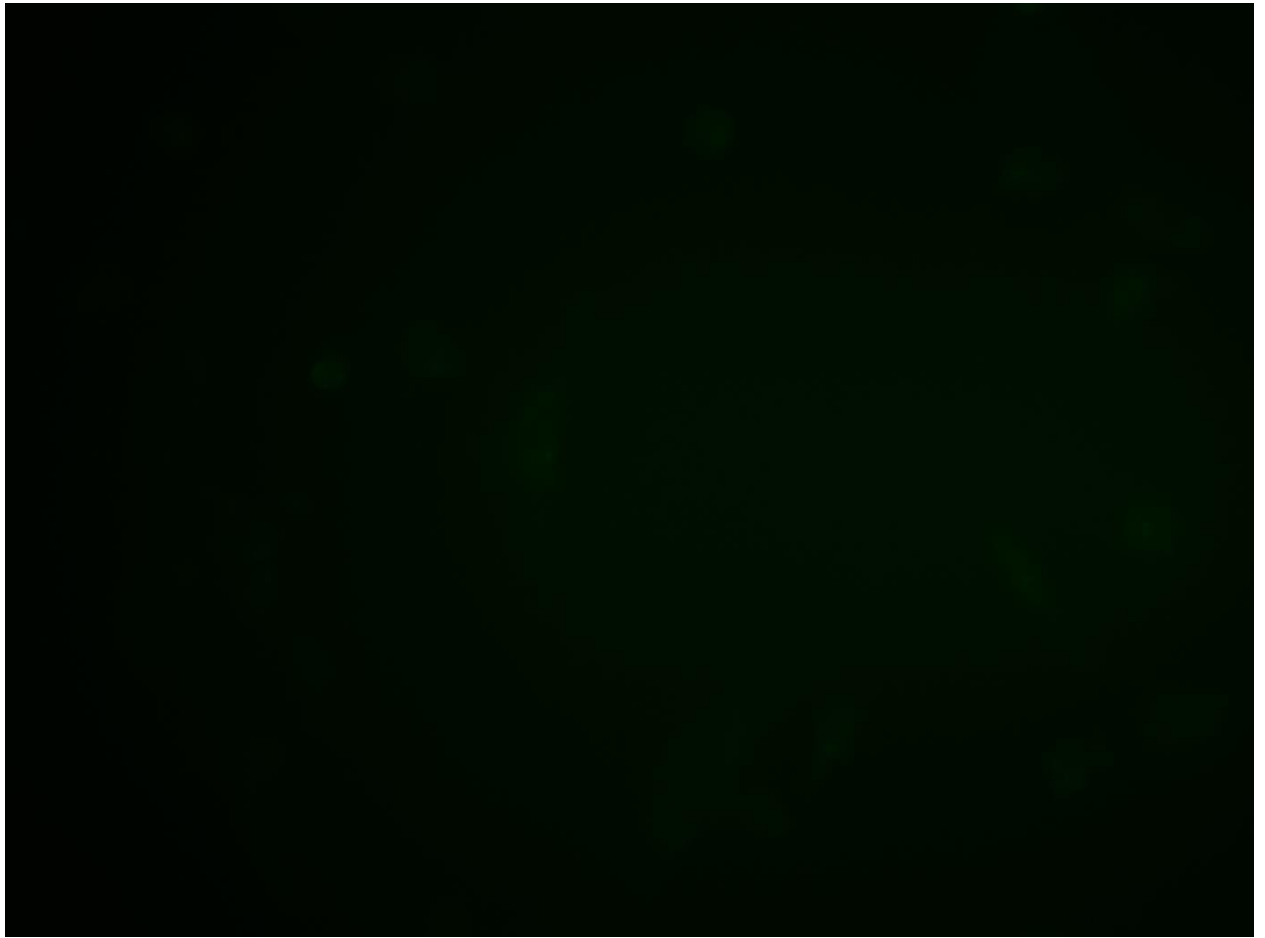

**Figure 6.** ICC staining of BRO tumor cells treated with primary rabbit antibodies #ab2350 (Abcam, Cambridge, UK) to VEGFR-1 and secondary FITC-conjugated #ab6717 (Abcam, Cambridge, UK) anti-rabbit antibodies.

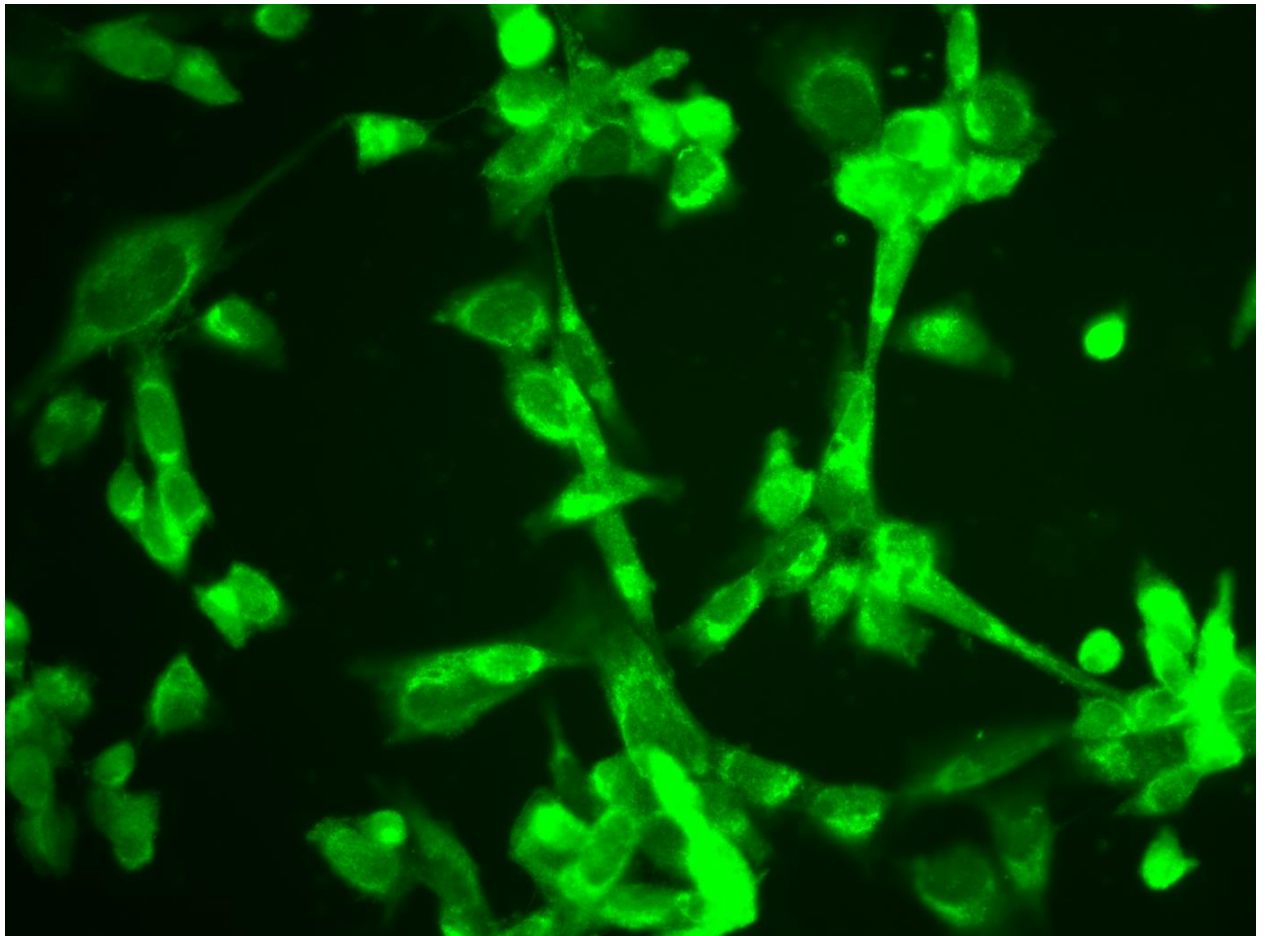

**Figure 7.** ICC staining of BRO tumor cells treated with 0.05% PBST prior to fixation. Staining with only secondary FITC-conjugated #ab6717 (Abcam, Cambridge, UK) anti-rabbit antibodies (negative control).

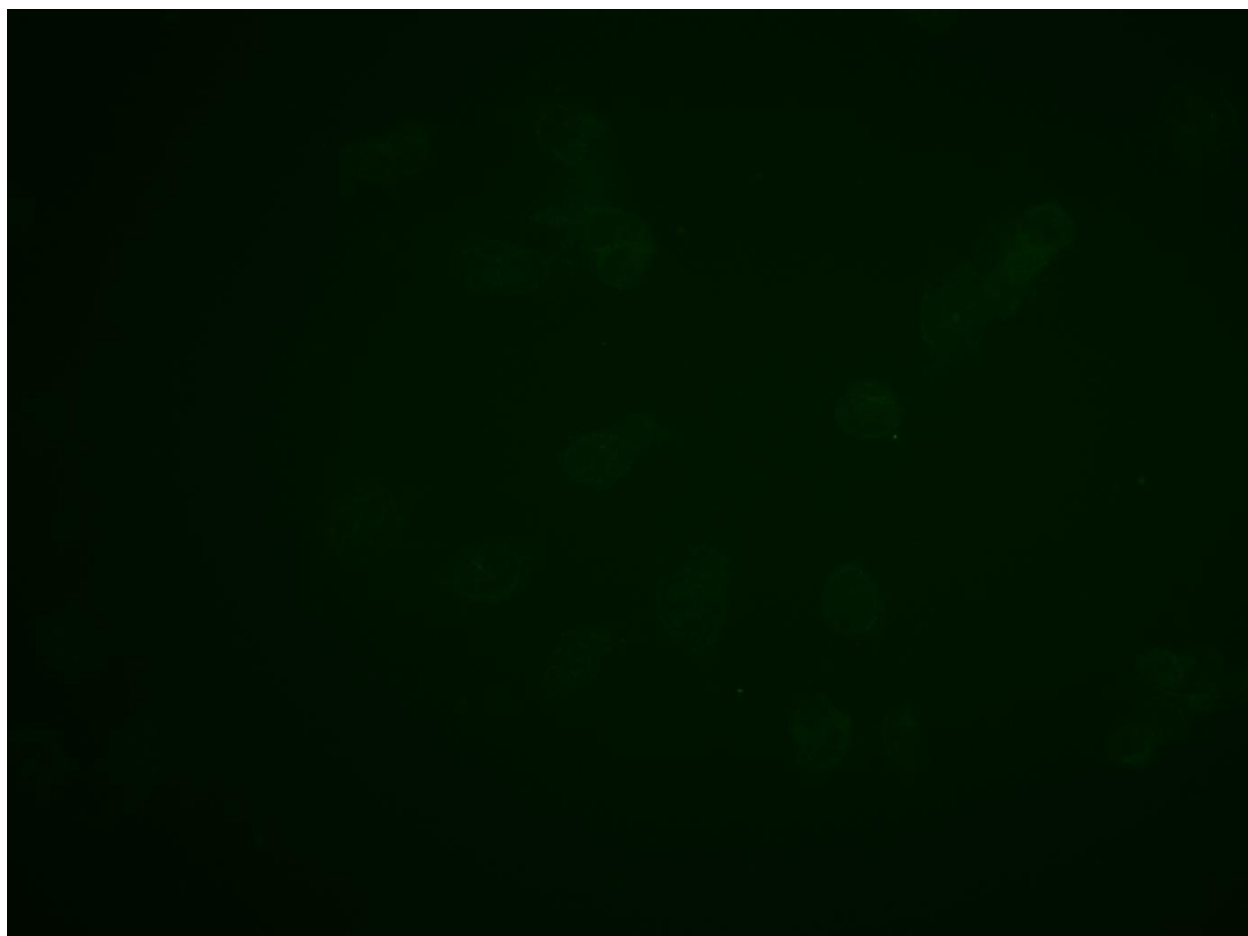

**Figure 8.** ICC staining of BRO tumor cells treated with 0.05% PBST prior to fixation. Staining with primary rabbit antibodies #ab2350 (Abcam, Cambridge, UK) to VEGFR-1 and secondary FITC-conjugated #ab6717 (Abcam, Cambridge, UK) anti-rabbit antibodies.

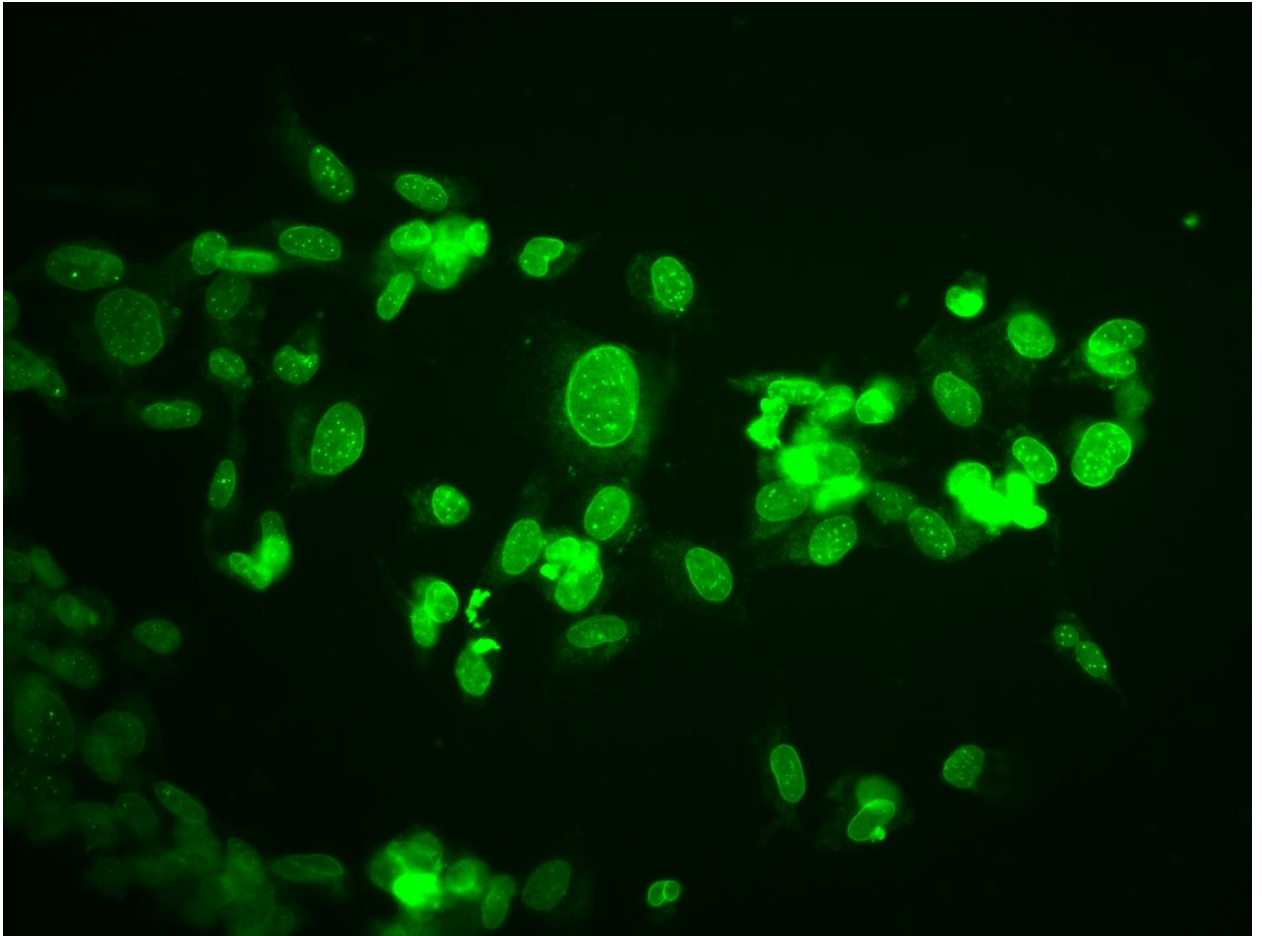



**Figure 9.** ICC staining of BRO tumor cells treated with 0.05% PBST prior to fixation. Staining with primary rabbit antibodies #ab16048 (Abcam, Cambridge, UK) to Lamin B1 and secondary FITC-conjugated #ab6717 (Abcam, Cambridge, UK) anti-rabbit antibodies.

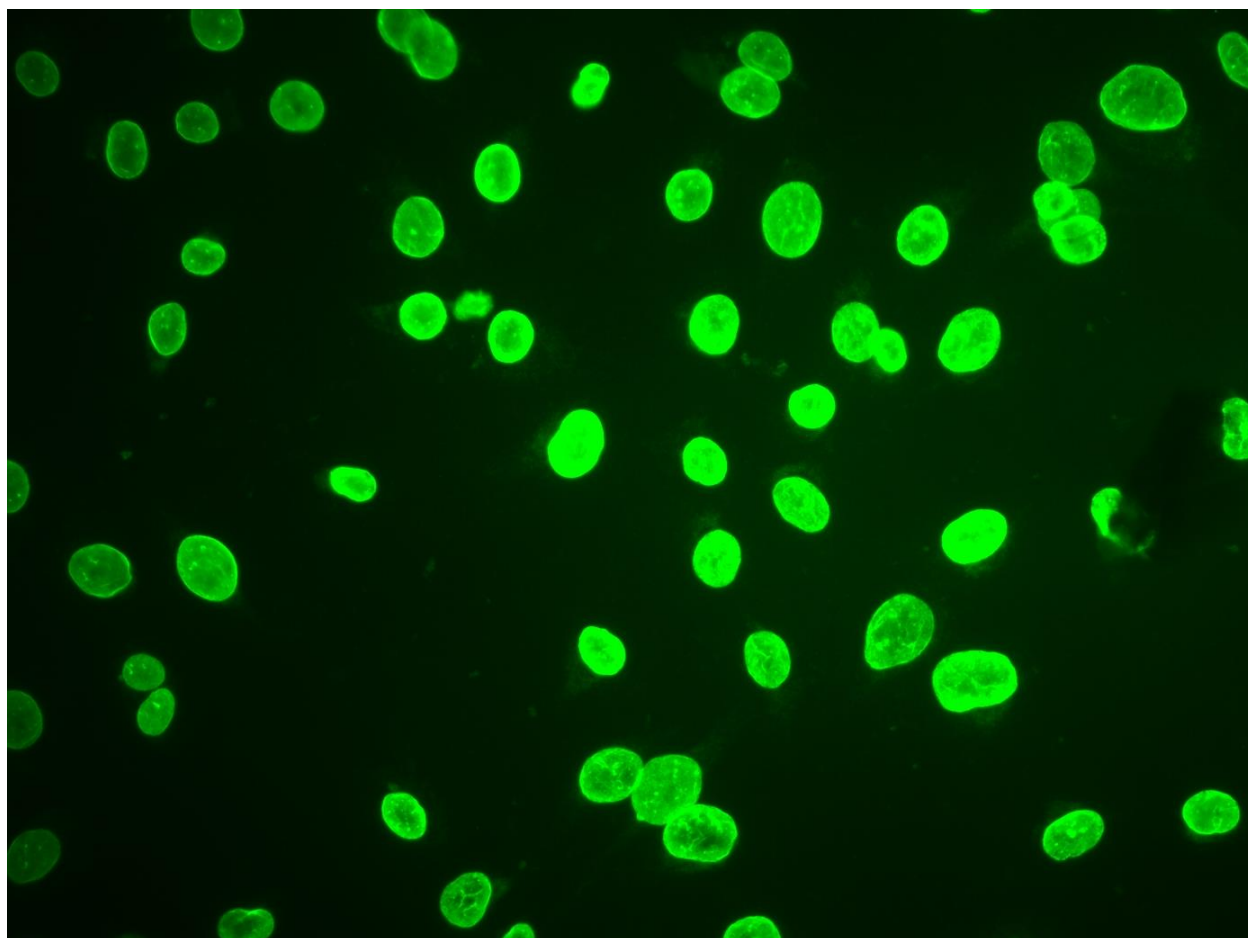

**Figure 10.** FC analysis of PCNA in nuclei of A431 tumor cells. Staining with primary mouse antibodies #29 (Abcam, Cambridge, UK) to PCNA (dark gray) and only with control #STAR70 (Serotec, Hercules, CA) FITC-goat anti-mouse IgG (white). The graph overlapping area is light-gray. A high content of PCNA was found in extracted nuclei ( $\Delta\text{MFI} = 800 \pm 176$ ).

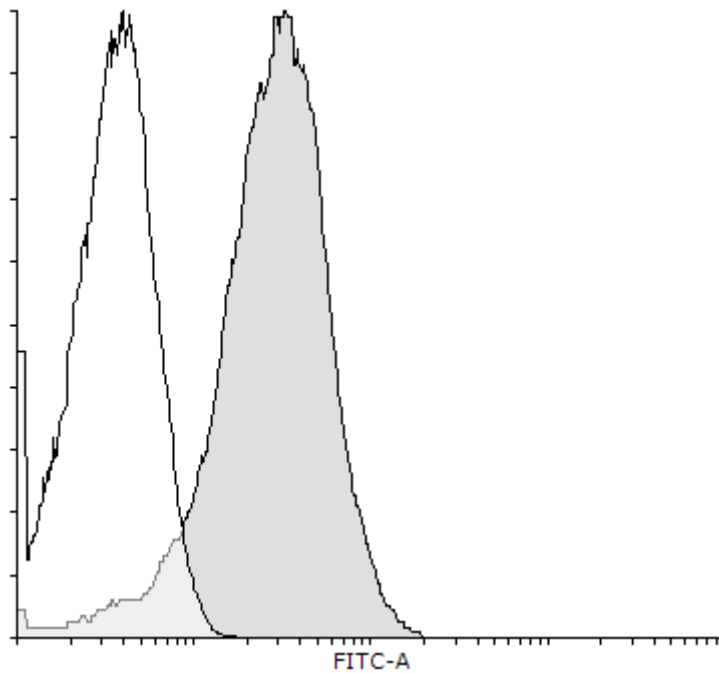

Supplement: Supplementary file 1 [file 14886764]
